# Supplementary material for: Implications from palaeoseismological investigations at the Markgrafneusiedl Fault (Vienna Basin, Austria) for seismic hazard assessment
Source: Copernicus journal article supplement (doi:10.5194/nhess-18-531-2018), 2018-02-21
Supplement: Supplementary file 1 [file nhess-18-531-2018-supplement.zip]

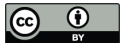

## *Supplement of*

# **Implications from palaeoseismological investigations at the Markgrafneusiedl Fault (Vienna Basin, Austria) for seismic hazard assessment**

**Esther Hintersberger et al.**

*Correspondence to:* Esther Hintersberger ([esther.hintersberger@univie.ac.at](mailto:esther.hintersberger@univie.ac.at))

- [nhess-18-531-2018-supplement-title-page.pdf](#)
- [Supp\\_1\\_Trench\\_SDF1\\_Photomosaique.pdf](#)
- [Supp\\_2\\_Trench\\_SDF3\\_Photomosaique.pdf](#)
- [Supp\\_3\\_Oxcal\\_code.pdf](#)

The copyright of individual parts of the supplement might differ from the CC BY 3.0 License.
