# Supplementary material for: Implications from palaeoseismological investigations at the Markgrafneusiedl Fault (Vienna Basin, Austria) for seismic hazard assessment
Source: Copernicus journal article supplement (doi:10.5194/nhess-18-531-2018), 2018-02-21
Supplement: Supplementary file 3 [file nhess-18-531-2018-supplement.zip]

OxCal code for slip models 1 and 2 using uniform distributions for the IRSL dating results. The same routine was carried out using normal distributions for the IRSL dating results, but with negligible differences in the results. Results are shown in Figure 11 (upper and lower panel, respectively). Prior to this joint calculation, each sequence was calculated by its own; the results are presented in Figure 11, middle panel.

```
Plot()
{
Phase("slip model 1 (U)")
{
Sequence("SDF3_U")
{
Date("IRSL-93", U(2011-179000, 2011-137000,
10));
Date("IRSL-95", U(2011-139000, 2011-107000,
10));
Date("E6a");
Date("E5a");
Date("IRSL-96", U(2011-123060, 2011-99800,
10));
Date("IRSL-97", U(2011-78800, 2011-62800,
10));
Date("E4a");
Date("E2");
Date("IRSL-98", U(2011-37000, 2011-26800,
10));
Date("E1");
Date("IRSL-102", U(2011-5300, 2011-4300,
10));
Date("E0", AD(2011));
};
Sequence("SDF1_U")
{
Date("E6a");
Date("IRSL-39", U(2010-116000, 2010-92000,
10));
Date("E5a");
Date("E4a");
Date("IRSL-40", U(2010-66300, 2010-50900,
10));
Date("IRSL-41", U(2010-53700, 2010-44100,
10));
Date("E3");
Date("E2");
Date("IRSL-44", U(2010-18100, 2010-14500,
10));
Date("E1");
Date("IRSL-46", U(2010-15200, 2010-12400,
10));
Date("E0");
};
Sequence("WAG_U")
{
Date("E2");
Date("IRSL-25", U(2010-17800, 2010-14400,
10));
Date("IRSL-26", U(2010-16600, 2010-13600,
10));
Date("E1");
};
Difference("RI02", "E0", "E2");
Difference("RI23", "E2", "E3");
Difference("RI34", "E3", "E4a");
Difference("RI45", "E4a", "E5a");
Difference("RI56", "E5a", "E6a");
Difference("RI6-End", "E6a", "IRSL-93");
};
}
```

```
Plot()
{
Phase("slip model 2 (U)")
{
Sequence("SDF3_U")
{
Date("IRSL-93", U(2011-179000, 2011-137000,
10));
Date("IRSL-95", U(2011-139000, 2011-107000,
10));
Date("E5b");
Date("E4b");
Date("IRSL-96", U(2011-123060, 2011-99800,
10));
Date("IRSL-97", U(2011-78800, 2011-62800,
10));
Date("E3");
Date("E2");
Date("IRSL-98", U(2011-37000, 2011-26800,
10));
Date("E1");
Date("IRSL-102", U(2011-5300, 2011-4300,
10));
Date("E0", AD(2011));
}; Sequence("SDF1_U")
{
Date("IRSL-39", U(2010-116000, 2010-92000,
10));
Date("E5b");
Date("E4b");
Date("IRSL-40", U(2010-66300, 2010-50900,
10));
Date("IRSL-41", U(2010-53700, 2010-44100,
10));
Date("E3");
Date("E2");
Date("IRSL-44", U(2010-18100, 2010-14500,
10));
Date("E1");
Date("IRSL-46", U(2010-15200, 2010-12400,
10));
Date("E0");
};
Sequence("WAG_U")
{
Date("E2");
Date("IRSL-25", U(2010-17800, 2010-14400,
10));
Date("IRSL-26", U(2010-16600, 2010-13600,
10));
Date("E1");
};
};
Difference("RI02", "E0", "E2");
Difference("RI23", "E2", "E3");
Difference("RI34", "E3", "E4b");
Difference("RI45", "E4b", "E5b");
Difference("RI5-End", "E5b", "IRSL-93");
};
```
