# Supplementary figures and images for: Implications from palaeoseismological investigations at the Markgrafneusiedl Fault (Vienna Basin, Austria) for seismic hazard assessment
Source: Copernicus journal article supplement (doi:10.5194/nhess-18-531-2018), 2018-02-21

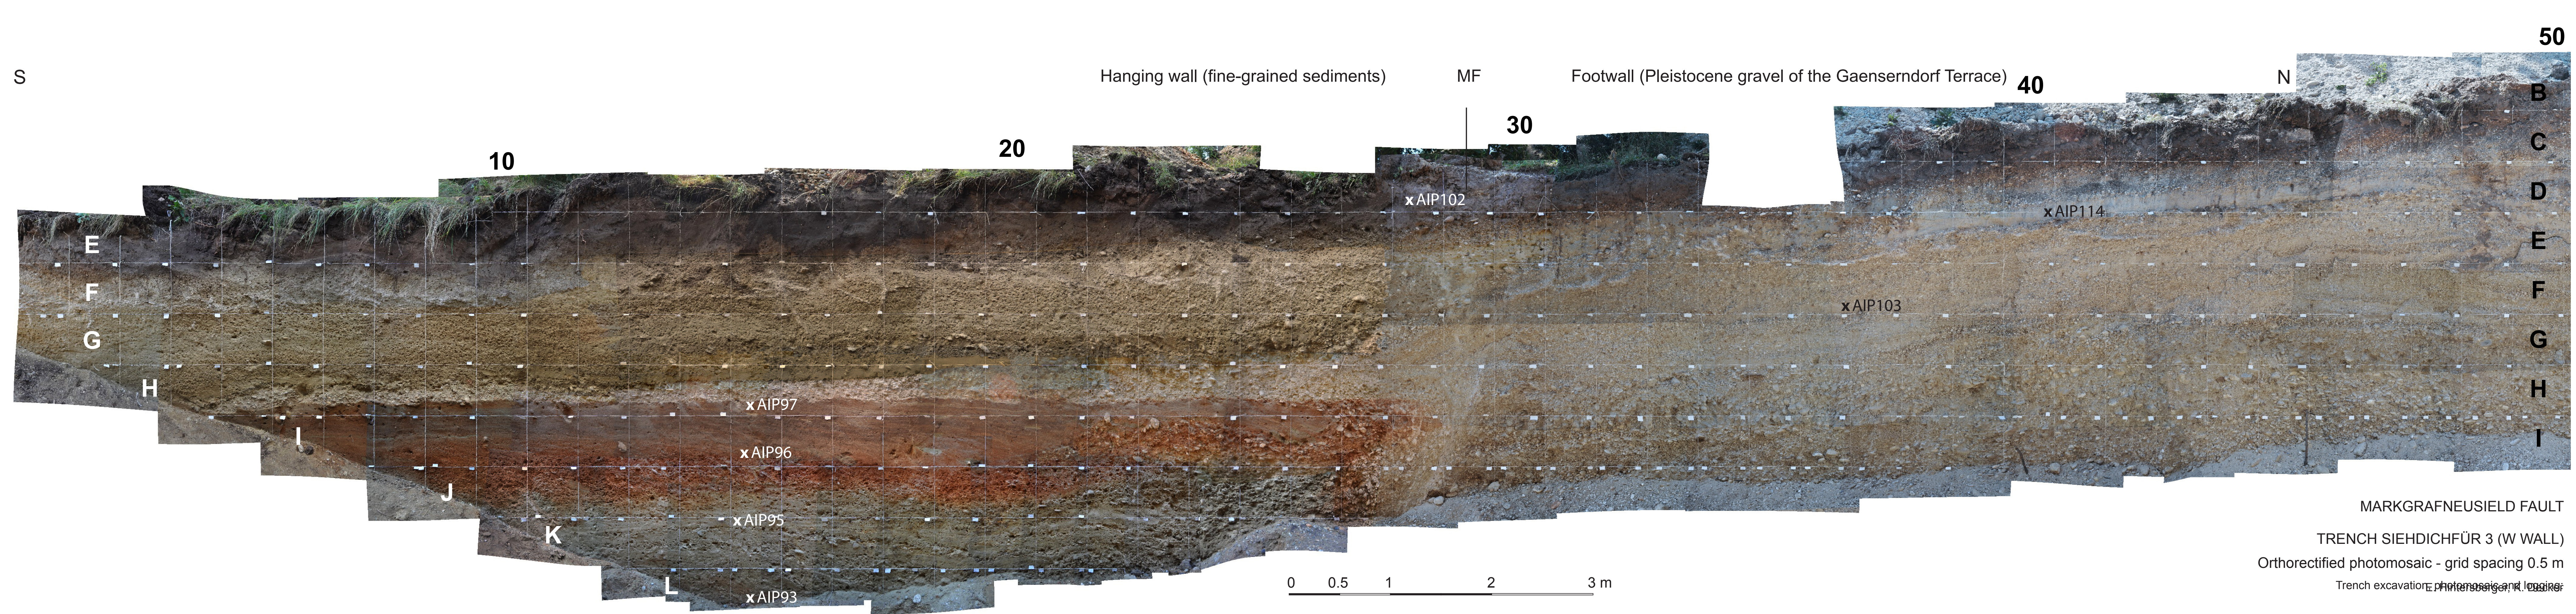

Supplement: Supplementary file 2 [file nhess-18-531-2018-supplement.zip]

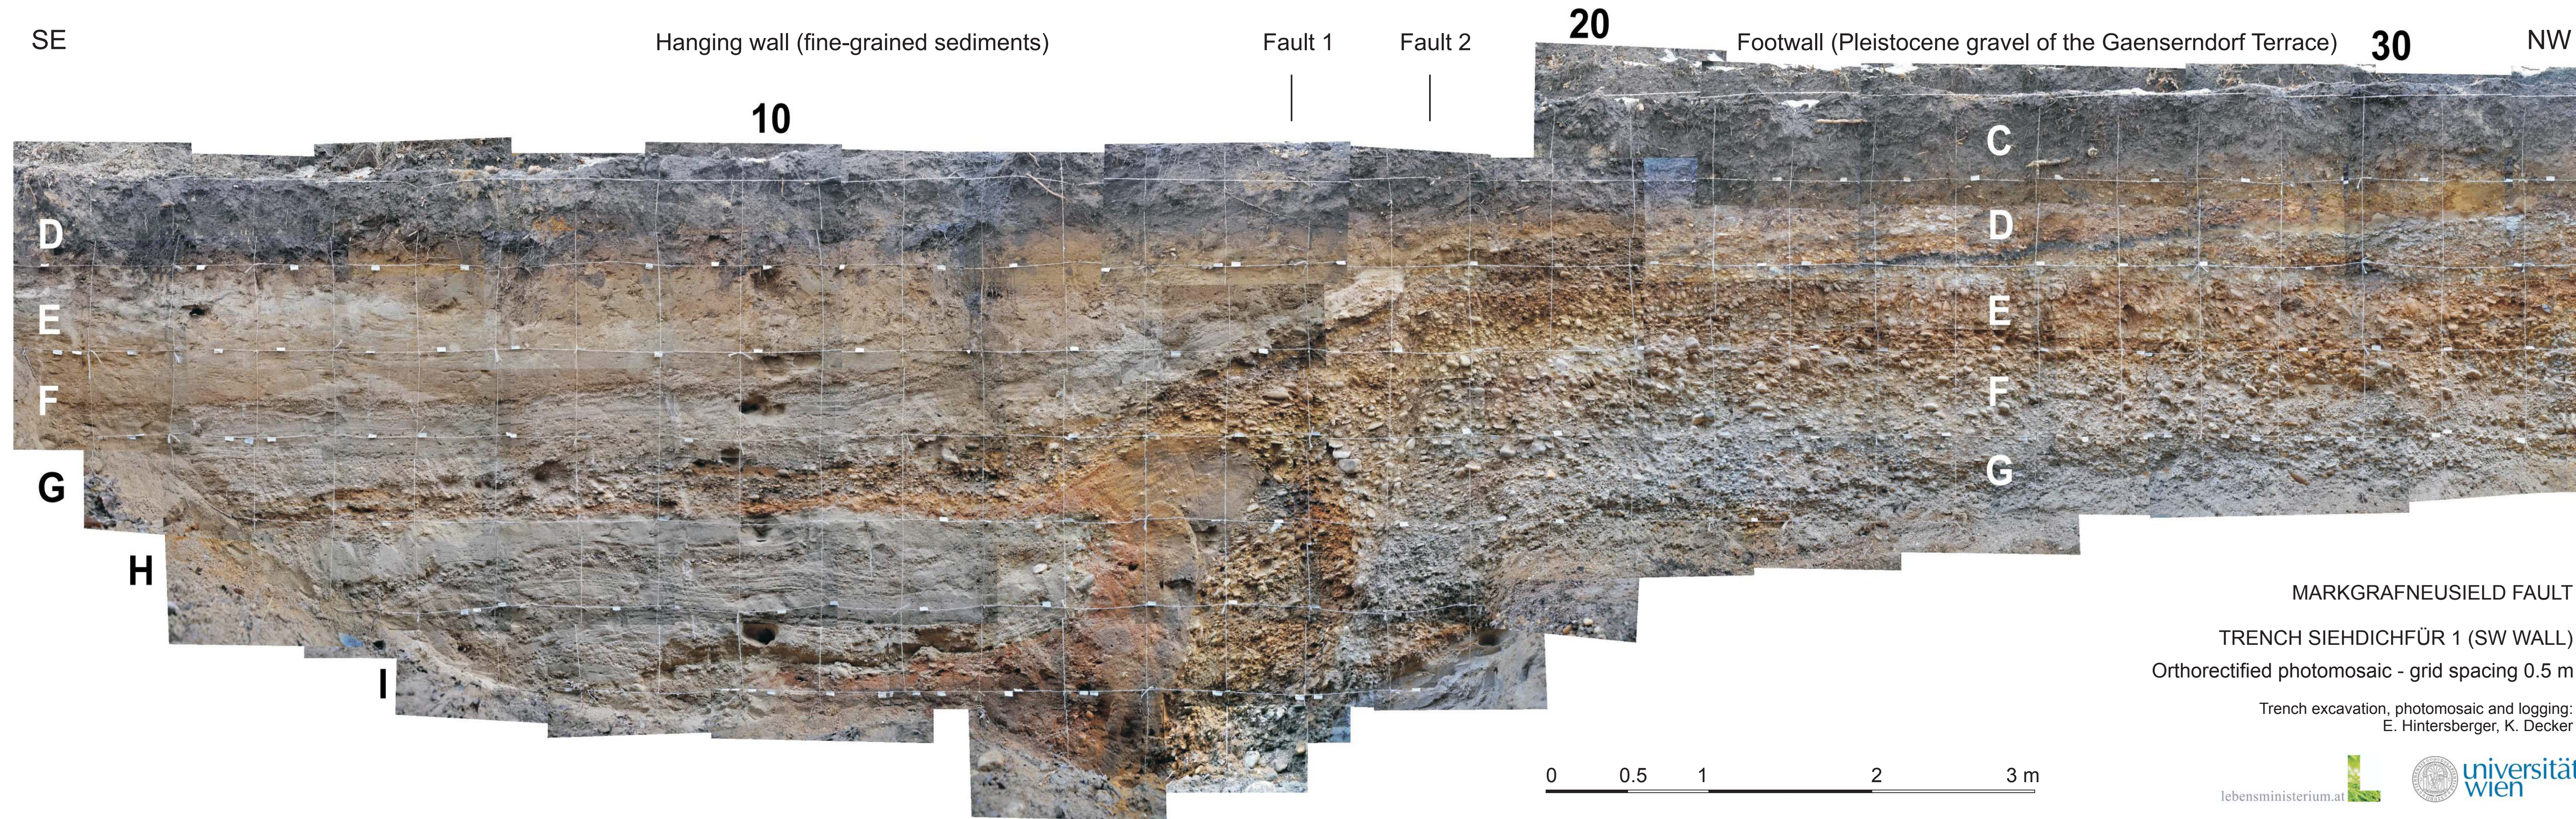

Supplement: Supplementary file 4 [file nhess-18-531-2018-supplement.zip]
